# Supplementary material
Source: PubMed Central journal article supplement (PMC4790808)
Supplement: lawd006900.wt1_default.pdf [file lawd006900.wt1_default.pdf]

**Supplementary table** ICD-9 (international classification of diseases, ninth revision) and ICD-10 codes used to define major causes of death

| <b>Causes of death</b>                    | <b>ICD-9 codes</b>     | <b>ICD-10 codes</b>               |
|-------------------------------------------|------------------------|-----------------------------------|
| Ischaemic heart disease                   | 410-414, 429.2         | I20-I25                           |
| Cerebrovascular disease                   | 430-434, 436-438       | I60-I69                           |
| Other heart disease                       | Other 390-434, 436-448 | Other I00-I78                     |
| Malignant neoplasms                       | 140-208                | C00-C97                           |
| Chronic obstructive pulmonary disease     | 490-494, 496           | J40-J47                           |
| Influenza and pneumonia                   | 480-487                | J10-J18                           |
| Diabetes mellitus                         | 250                    | E10-E14                           |
| Human immunodeficiency virus              | 042-044                | B20-B24                           |
| Chronic liver disease or cirrhosis        | 571                    | K70, K73, K74                     |
| Kidney disease                            | 580-590                | N00-N07, N10-N12, N13.6,<br>N15.1 |
| Dementia                                  | 290                    | F00-F03                           |
| Alzheimer's disease                       | 331                    | G30                               |
| Other physical illness or condition       | Other 001-799          | Other A00-R99                     |
| Suicide                                   | 950-959                | X60-X84                           |
| Homicide                                  | 960-969                | X85-Y09                           |
| Complications of medical or surgical care | 870-879, 930-949       | Y40-Y84, Y88                      |
| Other accident or injury                  | Other 800-999          | Other U50-Y98                     |
